# Supplementary material
Source: PubMed Central journal article supplement (PMC4893646)
Supplement: thnov06p1205s1.pdf [file thnov06p1205s1.pdf]

**Supplementary Table 1. The sequence of si-RNAs**

| Gene name        |    | Sequence (5'-3')                      |
|------------------|----|---------------------------------------|
| Axl              | #1 | Sense: CAAGAUUCUAGAUGAUUAAAdTdT       |
|                  |    | Anti-sense: UAAAUCAUCUAGAAUCUUGdTdT   |
|                  | #2 | Sense: UCGCGGUGCUGGGAGCUAAAdTdT       |
|                  |    | Anti-sense: UUAGCUCCCAGCACCGCGAdTdT   |
|                  | #3 | Sense: CGUGGAGAACAGCGAGAUUUAdTdT      |
|                  |    | Anti-sense: UAAAUCUCGCUGUUCUCCACGdTdT |
| Akt              | #1 | Sense: CUGACCAAGAUGACAGCAUdTdT        |
|                  |    | Anti-sense: AUGCUGUCAUCUUGGUCAGdTdT   |
|                  | #2 | Sense: GUGGUCAUGUACGAGAUGAdTdT        |
|                  |    | Anti-sense: UCAUCUCGUACAUGACCACdTdT   |
|                  | #3 | Sense: CUCCUCAAGAAUGAUGGCAAdTdT       |
|                  |    | Anti-sense: UGCCAUCAUUCUUGAGGAGdTdT   |
| $\beta$ -catenin | #1 | Sense: ACGACUAGUUCAGUUGCUUdTdT        |
|                  |    | Anti-sense: AAGCAACUGAACUAGUCGUdTdT   |
|                  | #2 | Sense: CCUGGUGAAAUGCUUGGUdTdT         |
|                  |    | Anti-sense: ACCAAGCAUUUUCACCAGGdTdT   |
|                  | #3 | Sense: GUGCUAUCUGUCUGCUCUAdTdT        |
|                  |    | Anti-sense: UAGAGCAGACAGAUAGCACdTdT   |
| ZEB1             | #1 | Sense: CACAGAUACGGCAAAGAAdTdT         |
|                  |    | Anti-sense: AUCUUUUGCCGUAUCUGUGdTdT   |
|                  | #2 | Sense: CAGUGUCCAUGCUUAAGAdTdT         |
|                  |    | Anti-sense: UCUUAAGCAUGGAACACUGdTdT   |
|                  | #3 | Sense: UGACCUAAGCAGCCUACUdTdT         |
|                  |    | Anti-sense: AGUAGGCUGCUUUAGGUCAdTdT   |

**Supplementary Table 2. Classification of breast cancer cell lines  
according to EMT markers**

| <b>Order</b> | <b>Cell lines</b> | <b>Classification</b> |
|--------------|-------------------|-----------------------|
| 1            | AU565             | Epithelial            |
| 2            | BT20              | Epithelial            |
| 3            | BT474             | Epithelial            |
| 4            | BT483             | Epithelial            |
| 5            | BT549             | Mesenchymal           |
| 6            | CAL120            | Mesenchymal           |
| 7            | CAL148            | Epithelial            |
| 8            | CAL51             | Epithelial            |
| 9            | CAL851            | Epithelial            |
| 10           | CAMA1             | Epithelial            |
| 11           | DU4475            | Epithelial            |
| 12           | EFM19             | Epithelial            |
| 13           | EFM192A           | Epithelial            |
| 14           | EVSAT             | Epithelial            |
| 15           | HCC1143           | Epithelial            |
| 16           | HCC1187           | Epithelial            |
| 17           | HCC1395           | Epithelial            |
| 18           | HCC1419           | Epithelial            |
| 19           | HCC1428           | Epithelial            |
| 20           | HCC1500           | Epithelial            |
| 21           | HCC1569           | Epithelial            |
| 22           | HCC1599           | Epithelial            |
| 23           | HCC1806           | Epithelial            |
| 24           | HCC1937           | Epithelial            |
| 25           | HCC1954           | Epithelial            |
| 26           | HCC202            | Epithelial            |

|    |             |             |
|----|-------------|-------------|
| 27 | HCC2157     | Epithelial  |
| 28 | HCC2218     | Epithelial  |
| 29 | HCC38       | Epithelial  |
| 30 | HCC70       | Epithelial  |
| 31 | HDQP1       | Epithelial  |
| 32 | HMEL        | Epithelial  |
| 33 | HS274T      | Mesenchymal |
| 34 | HS281T      | Mesenchymal |
| 35 | HS343T      | Mesenchymal |
| 36 | HS578T      | Mesenchymal |
| 37 | HS606T      | Mesenchymal |
| 38 | HS739T      | Mesenchymal |
| 39 | JIMT1       | Epithelial  |
| 40 | KPL1        | Epithelial  |
| 41 | MCF7        | Epithelial  |
| 42 | MDAMB134VI  | Epithelial  |
| 43 | MDAMB157    | Mesenchymal |
| 44 | MDAMB175VII | Epithelial  |
| 45 | MDAMB231    | Mesenchymal |
| 46 | MDAMB361    | Epithelial  |
| 47 | MDAMB415    | Epithelial  |
| 48 | MDAMB436    | Mesenchymal |
| 49 | MDAMB453    | Epithelial  |
| 50 | MDAMB468    | Epithelial  |
| 51 | SKBR3       | Epithelial  |
| 52 | T47D        | Epithelial  |
| 53 | UACC812     | Epithelial  |
| 54 | UACC893     | Epithelial  |
| 55 | YMB1        | Epithelial  |

|    |        |            |
|----|--------|------------|
| 56 | ZR751  | Epithelial |
| 57 | ZR7530 | Epithelial |

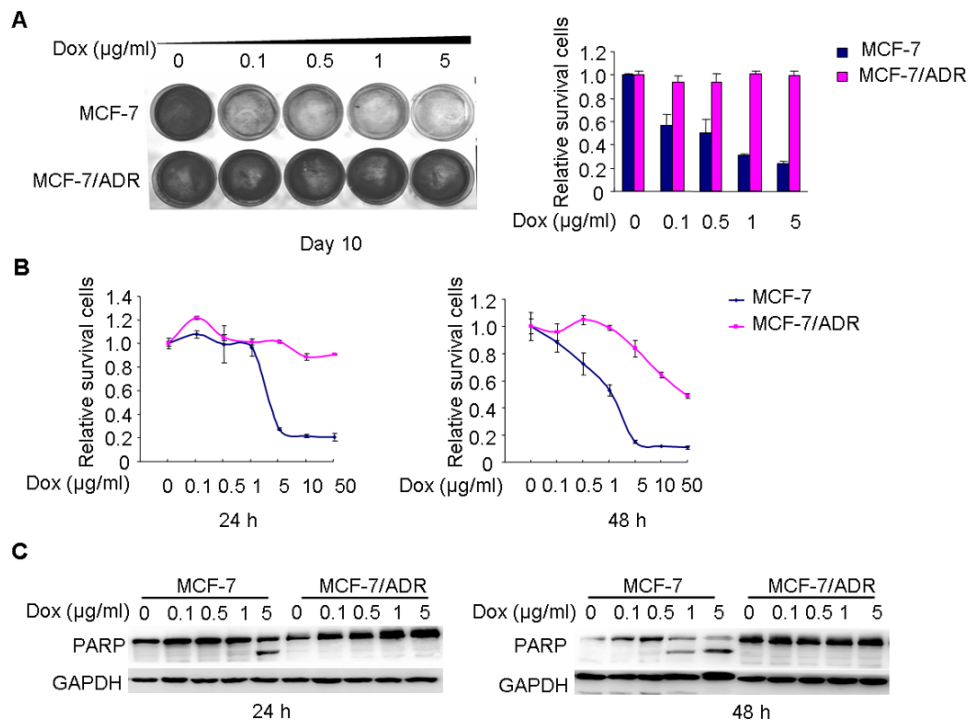

### Supplementary Figure 1. Characterization of acquired Dox resistance in breast cancer cells

**(A)** Colony formation assay of cells treated continuously for 10 days with Dox. Histogram represents the relative analysis of survival of cells in parental (MCF-7) and drug-resistant cells (MCF-7/ADR) treated with increasing doses of Dox. **(B)** Cell viability assays of MCF-7 and MCF-7/ADR cells treated with increasing doses of Dox for 24 or 48 h. **(C)** Western blotting analysis for PARP in MCF-7 and MCF-7/ADR cells treated with increasing doses of Dox for 24 or 48 h.

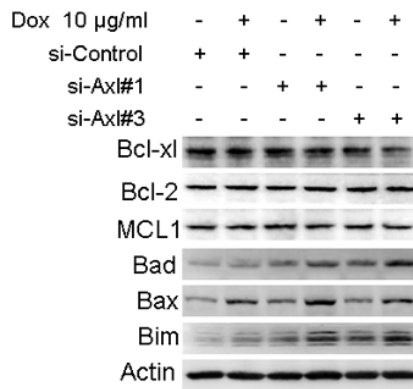

**Supplementary Figure 2. Impact of Axl signaling pathway on survival/apoptotic factors.**

MCF-7/ADR cells transfected with si-Axl or si-control were cultured in the absence or presence of 10  $\mu$ g/ml Dox for 48 h. Changes of survival/apoptotic factors (Bcl-xl, Bcl-2, MCL-1, Bad, Bax, and Bim) were analyzed by Western blotting.

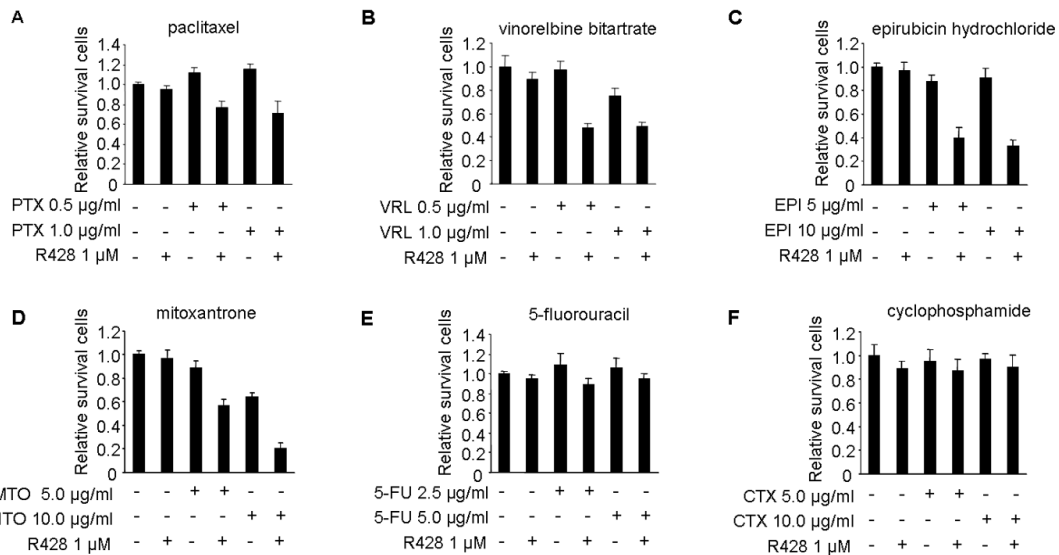

**Supplementary Figure 3. R428 increased the chemosensitivity of several drugs in MCF-7/ADR cells**

(A-D) Synergistic response of MCF-7/ADR cells to the combination of Axl inhibitor and several clinically used chemotherapeutic drugs (paclitaxel, vinorelbine bitartrate, epirubicin hydrochloride, and mitoxantrone). (E-F) Combination of Axl inhibitor R428 and 5-fluorouracil or cyclophosphamide exhibited no synergistic effects on MCF-7/ADR cells.

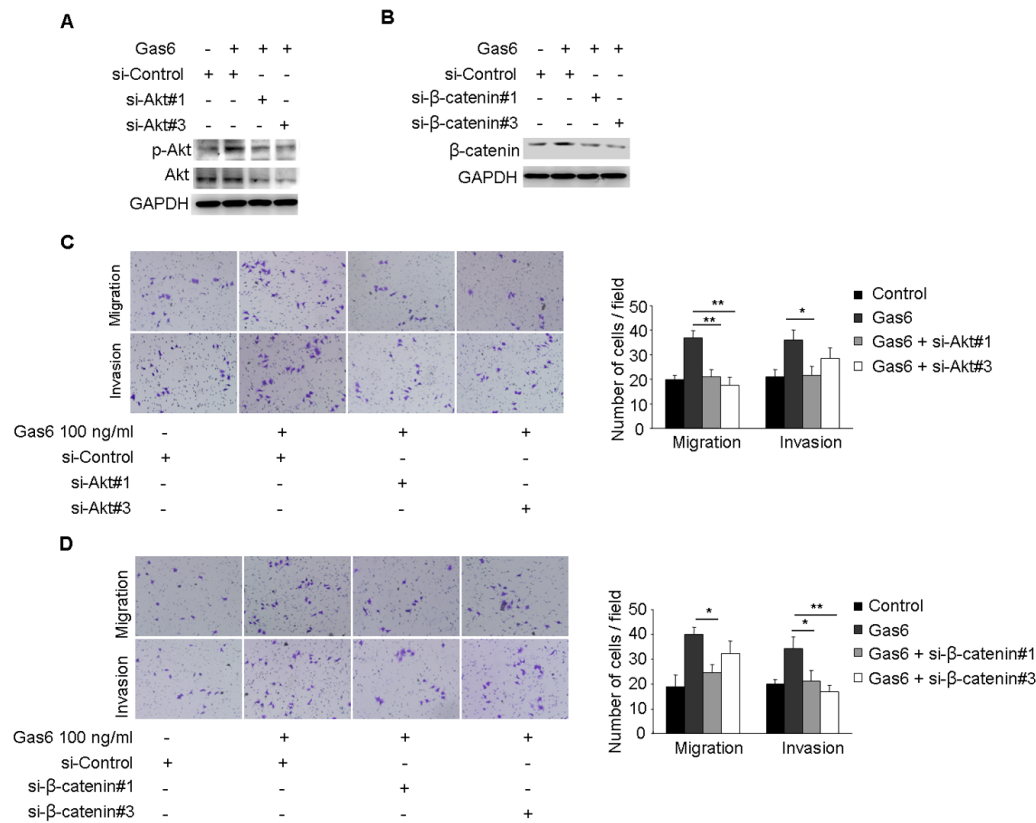

**Supplementary Figure 4. Akt/GSK3β/β-catenin signaling is responsible for Gas6-induced cell invasion**

(A-B) MCF-7 cells stimulated with 100 ng/ml Gas6 for 24 h were transfected with si-Akt, si-β-catenin or si-control. Whole-cell lysates from indicated cells were analyzed by Western blot for Akt, p-Akt, and β-catenin. (C-D) Migratory and invasive behaviors of the indicated cells were analyzed using transwell and matrigel invasion assays (magnification, ×200). \* $P < 0.05$ , \*\* $P < 0.01$ .



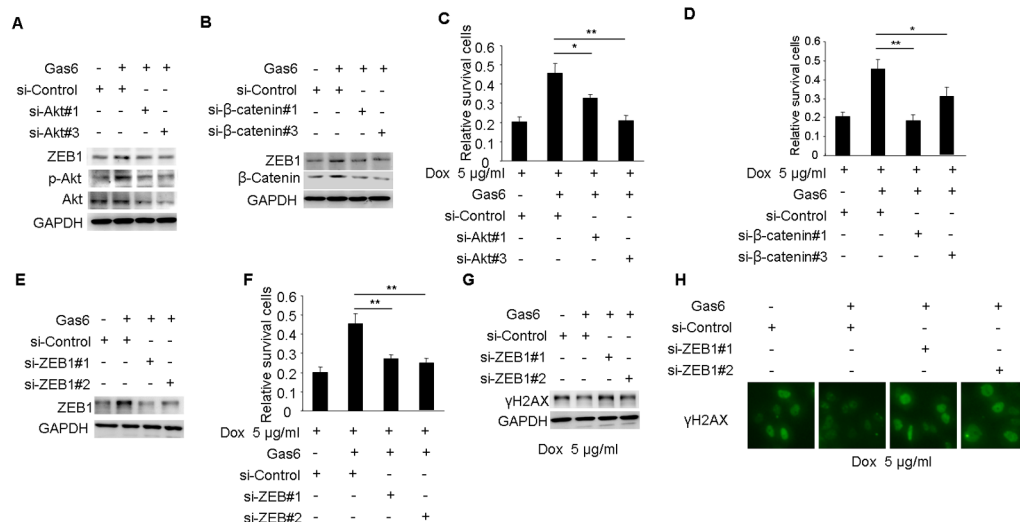

### Supplementary Figure 5. Akt/GSK3β/β-catenin/ZEB1 signaling is responsible for Gas6-mediated drug resistance

(A-B) MCF-7 cells stimulated with 100 ng/ml Gas6 for 24 h were transfected with si-Akt, si-β-catenin or si-control. Whole-cell lysates from indicated cells were analyzed by Western blot for Akt, p-Akt, β-catenin and ZEB1. (C-D) MCF-7 cells stimulated by Gas6 were transfected with si-Akt, si-β-catenin or si-control and cultured in the presence of 5 μg/ml Dox for 24 h. Relative cell survival was analyzed by CCK8 assays. (E-F) MCF-7 cells stimulated with 100 ng/ml Gas6 for 24 h were transfected with si-ZEB1 and cultured in the presence of 5 μg/ml Dox for 24 h. Relative cell survival was analyzed by CCK8 assays. (G-H) Gas6 stimulated MCF-7 cells were transfected by si-ZEB1 or si-control and cultured in the presence of 5 μg/ml Dox for 24 h. Western blot analysis and immunofluorescent staining for γH2AX were performed. \* $P < 0.05$ , \*\* $P < 0.01$ .

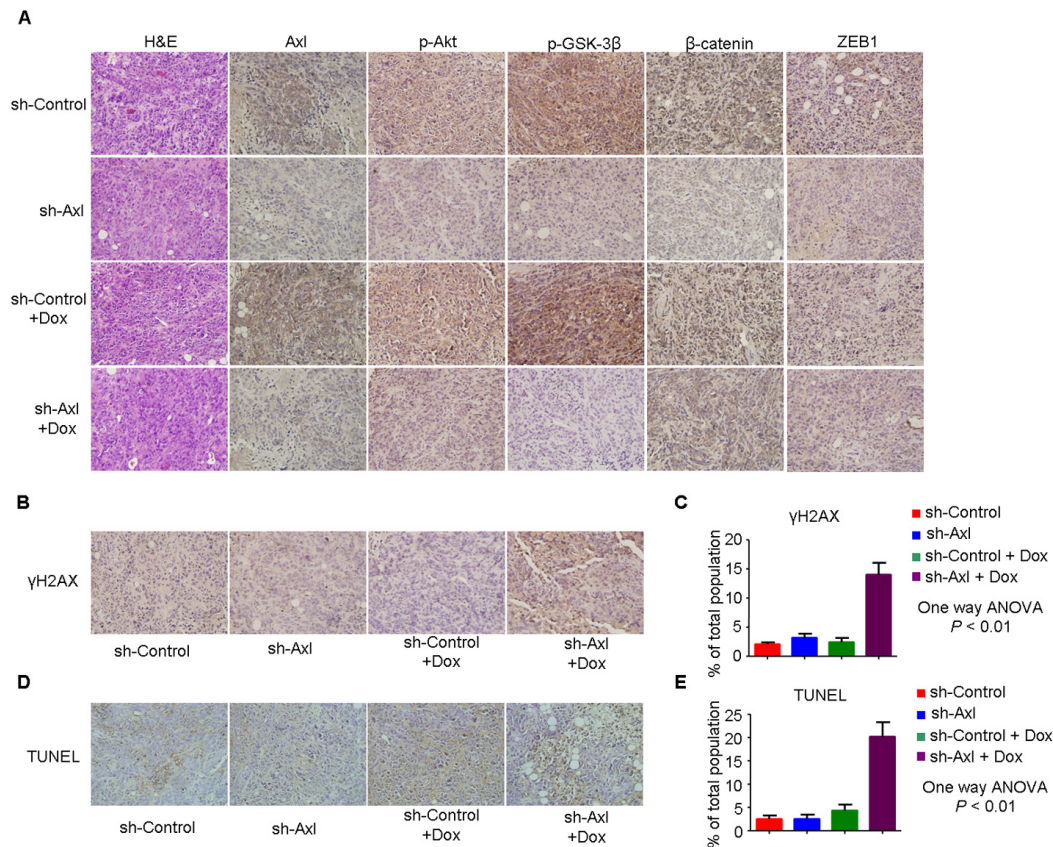

**Supplementary Figure 6. *In vivo* mechanism of antitumor activity of Axl knockdown combined with Dox in xenograft models**

**(A)** Representative immunohistochemical images of Axl, p-Akt, p-GSK3 $\beta$ ,  $\beta$ -catenin, and ZEB1 in subcutaneous control or Axl-silenced MCF-7/ADR xenografts during 21 days of therapy with vehicle or Dox (2 mg/kg i.p. twice weekly). **(B-C)** Representative immunohistochemical images and quantifications of  $\gamma$ H2AX-positive cells in subcutaneous control or Axl-silenced MCF-7/ADR xenografts. **(D-E)** Quantification of TUNEL-positive cells in control or Axl-silenced MCF-7/ADR xenografts treated with vehicle or Dox (2 mg/kg i.p. twice weekly) for 21 days.

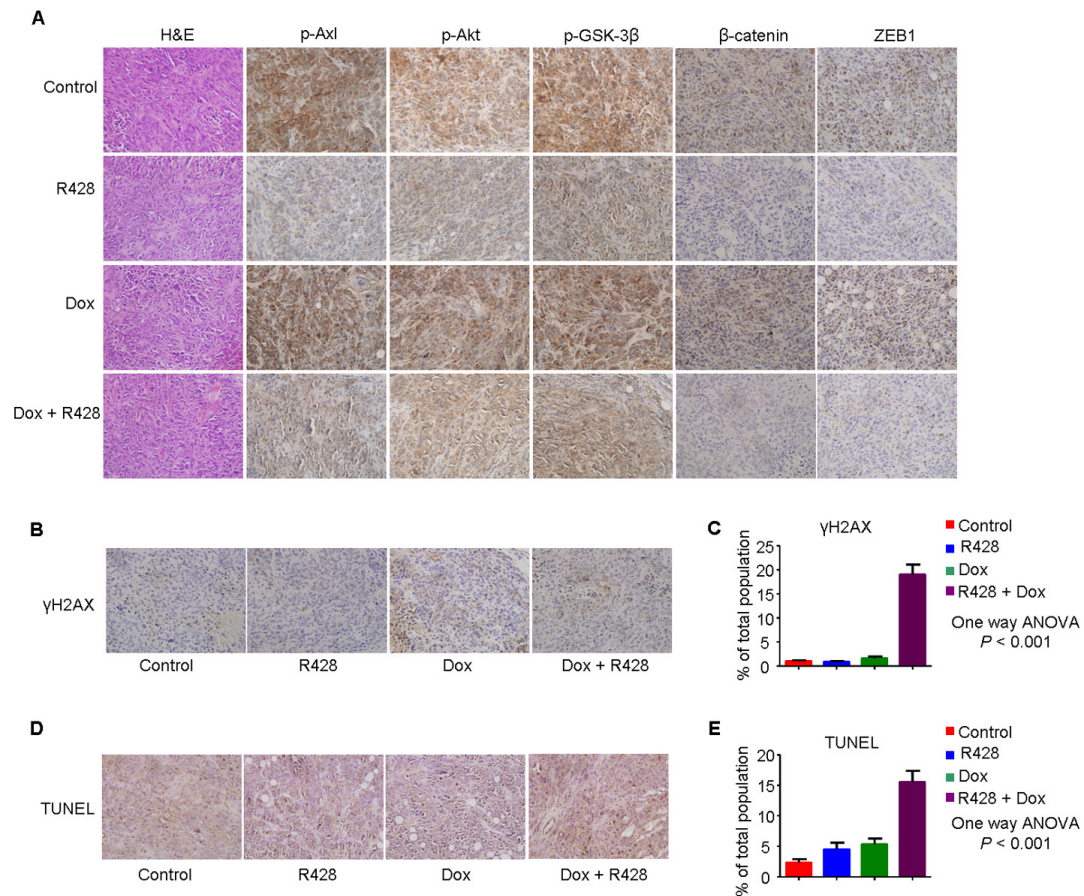

**Supplementary Figure 7. *In vivo* mechanism of antitumor activity of R428 combined with Dox in xenograft models**

**(A)** Representative immunohistochemical images of p-Axl, p-Akt, p-GSK3 $\beta$ ,  $\beta$ -catenin, and ZEB1 in subcutaneous MCF-7/ADR xenografts during 21 days of therapy with vehicle, R428 (25 mg/kg orally twice daily), Dox (2 mg/kg i.p. twice weekly), or combination treatment. **(B-C)** Representative immunohistochemical images and quantifications of  $\gamma$ H2AX levels in subcutaneous MCF-7/ADR xenografts after 21 days of the combination therapy described in (A). **(D-E)** Quantification of TUNEL-positive cells in vehicle, R428, Dox, or combination treatment groups.

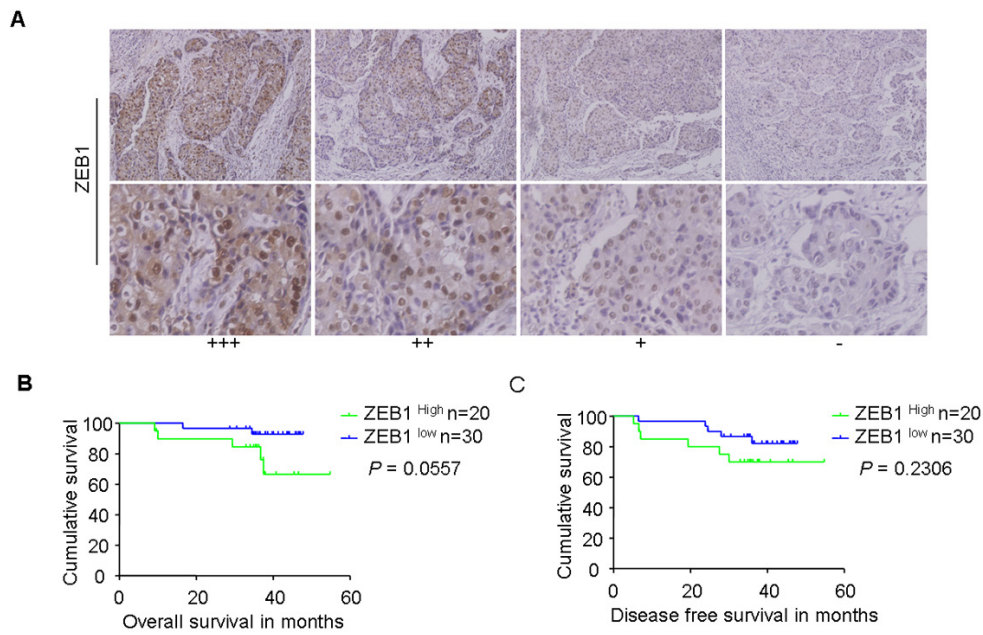

**Supplementary Figure 8. Predictive significance of ZEB1 expression on overall survival and disease-free survival in breast cancer patients treated with Dox-based adjuvant chemotherapy**

**(A)** Representative immunohistochemical images for ZEB1 in tumor specimens (score +++: strong positive; score ++: moderate positive; score +: weak positive; score -: negative). **(B-C)** Kaplan-Meier analysis of overall survival and disease-free survival in breast cancer cases based on ZEB1 expression levels.
